# Supplementary material for: Coastal sea level monitoring in the Mediterranean and Black seas
Source: Copernicus journal article supplement (doi:10.5194/os-18-997-2022), 2022-07-15
Supplement: Supplementary file 1 [file os-18-997-2022-supplement.zip]

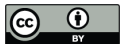

## *Supplement of*

# **Coastal sea level monitoring in the Mediterranean and Black seas**

**Begoña Pérez Gómez et al.**

*Correspondence to:* Begoña Pérez Gómez (bego@puertos.es)

- os-18-997-2022-supplement-title-page.pdf
- Survey\_Mediterranean\_Black Sea TG networks.xlsx

The copyright of individual parts of the supplement might differ from the article licence.
