# Supplementary material for: Coastal sea level monitoring in the Mediterranean and Black seas
Source: Copernicus journal article supplement (doi:10.5194/os-18-997-2022), 2022-07-15
Supplement: Supplementary file 1 [file os-18-997-2022-supplement.zip]

## Sheet: Hoja 1
Institution, Country	Nº of Stations	Nº Mediterranean Stations	Main purpose	Funding mechanism	Data policy	Raw Data Sampling	Latency	Maintenance status	Number of sea level sensors at each station	Type of Tide Gauge	Levelling	Number of TG's colocated and tied to a GNSS (MED Sea stations)	Ancillary measurements (MED Sea stations)	QC and Data processing	Data availability	Contact
Ports of Spain (PdE), Spain	41	17	All: multi-purpose	Subcontrating maintenance	Open and free	1-min	Real time (<= 1min)	Solved today no problems foreseen in the future	1	Radar gauge	Most of the stations levelled (high precision) to the national geodetic datum. Periodic levelling on the vicinity of the tide gauge during routine maintenance visits	5	Waves: 15 stations; atmospheric pressure: 11 stations; wind: 10 stations	Automatic NRT QC and Delayed Mode QC and products	Available through CMEMS INS TAC, IOC SLSMF, EMODnet Physics, GESLA, PSMSL, with different time samplings, and through Portus (PdE portal, including 2Hz raw data in PdE Opendap)	Begoña Pérez Gómez, bego@puertos.es
Spanish Institute for Oceanography (IEO), Spain	10	4	Tides and long-term msl	Own personnel and resources	Open and free through specific data portal	1-min	Near-real time (minutes/hours/days)	Solved today no problems foreseen in the future	1	Radar gauge	Tide-gauge benchmark levelled to the national geodetic datum			Delayed Mode QC and products	datos.ieo.es; seadatanet.org, PSMSL, GLOSS	Antonio Castaño Tierno (antonio.castano@ieo.es) and Elena Tel (elena.tel@ieo.es)
Spanish Hydrographic Office	6	2	Tides and hydrography	Own personnel and resources	Open and free	1-min	Real time (<= 1min)	Solved today no problems foreseen in the future	1	2 Radar gauge and 4 acoustics	Tide-gauge benchmark levelled to the national geodetic datum	4	Waves:6 stations; Atmospheric parameters (wind, pressure, temperature, humidity) at 4 stations	Automatic NRT QC and Delayed Mode QC and products		Marcos Larrad Revuelto, mlarrev@fn.mde.es
National Reserch Council, Institute of Marine Sciences (CNR-ISMAR), Italy	1	1	Geodesy and long-term msl	Own personnel and resources	Open and free	1-min	Delayed mode	Solved today no problems foreseen in the future	3	Float gauge	Tide-gauge benchmark levelled to the national geodetic datum (2002)		Atmospheric pressure	Delayed Mode QC and products	PSMSL, GLOSS	Fabio Raicich (fabio.raicich@ts.ismar.cnr.it)
National Geographic Institute, (IGN) Spain	10	5	All: multi-purpose	Own personnel and resources	Open and free	1-min	Real time (<= 1min)	Solved today but problems expected in the near future	2	Radar gauge	All the tide gauges are linked to a reference GNSS station and all except Alboran are also linked to the High Precision Leveling Network of Spain (REDNAP). Levelling works are made in the last 5-7 years.	5	Atmospheric pressure in Alicante 2 tide gauge	Delayed Mode QC and products	IGN web site, Portus (PdE portal), SONEL, PSMSL, IOC, EMODnet Physics	Víctor Martín Guijarro vmarting@mitma.es
Andrija Mohorovičić Geophysical Institute (AMGI), Croatia	1	1	All: multi-purpose	Own personnel and resources	Open and free only for research	1-min	Near-real time (minutes/hours/days)	Solved today no problems foreseen in the future	3	2 Float gauges 1 Radar gauge	Tide gauge benchmark levelled to the national geodetic datum (1938, 1963, 1986, 2015)	0	Atmospheric pressure	Automatic NRT QC and Delayed Mode QC and products	SEANOE (https://doi.org/10.17882/85171), PSMSL, GESLA, website of GFZ (http://geo101.gfz.hr/~bakar/index_files/)	Iva Međugorac ivamed@gfz.hr
Institute of Oceanography and Fisheries, Split, Croatia	7	7	All: multi-purpose	Own personnel and resources	Other: 1-min data are open and free, 1-hour qc data are open and free for research	1-min	Real time (<= 1min)	Other (specify): 1 station needs maintenance; one station is temporarly removed due to construction at the station site	1 at 6 stations; 2 at 1 station	2 Float gauges; 6 Radar gauges	Four stations levelled (high precision) to the national geodetic datum, 7 are planned to be levelled.	0	Atmospheric parameters (wind, pressure, temperature, humidity) at 5 stations	Delayed Mode QC	PSMSL, http://faust.izor.hr/autodatapub/postaje	Hrvoje Mihanović, hrvoje.mihanovic@izor.hr
ORION Ocean Research, Cyprus	1	1	Tides and hydrography	Own personnel and resources	Open and free only for research	1-min	Near-real time (minutes/hours/days)	Solved today but problems expected in the near future	1	Acoustic gauge	TG0		sea currents, wave, suspended particles	Delayed Mode QC		George Zodiatis oceanosgeos@gmail.com
GOV Department of Lands and Surveys (DLS), Cyprus	4	4	Tides and hydrography	Own personnel and resources	Other	1-min	Near-real time (minutes/hours/days)	Solved today no problems foreseen in the future	1	Radar gauge	TG0		sea temperature, atmospheric parameters (wind, pressure, temperature, humitity)	Delayed Mode QC		Giorgos Kokosis gkokosis@dls.moi.gov.cy
Department of Civil Engineering and Geoinformatics (CUT), Cyprus	1	1	Geodesy and long-term msl	Own personnel and resources	Other	1-min	Near-real time (minutes/hours/days)	Solved today no problems foreseen in the future	1	Radar gauge	TG0	1	sea temperature, atmospheric parameters (wind, pressure, temperature, humitity)	Delayed Mode QC		Christos Danezis chris.danezis@cut.ac.cy
Hellenic Navy Hydrographic Service (HNHS)	22	22	Tides and hydrography	Own personnel and resources	Open and free through specific data portal	15-min	Near-real time (minutes/hours/days)	Solved today no problems foreseen in the future	1	Float gauge		1		Delayed Mode QC and products	https://www.hnhs.gr/el/online/tide-graphs	Georgios Sylaios, gsylaios@env.duth.gr
Shom, France	50	14	All: multi-purpose	Own personnel and resources	Open and free	1 sec. resampled to 1 min and 10 min	Near-real time (minutes/hours/days)	Solved today no problems foreseen in the future	1	Radar gauge	Tide gauge benchmark levelled to the national geodetic datum	3	Atmosphéric pressure (To come : wind, pressure, temperature, humidity)	Delayed Mode QC	IOC SLSMF, CMEMS INS TAC, EMODnet Physics, GESLA, PSMSL, DATA Shom	Claire Fraboul, claire.fraboul@shom.fr
Hydrographic Institute of the Republic of Croatia, Croatia	5	5	All: multi-purpose	Own personnel and resources	Open and free only for research	1-min	Near-real time (minutes/hours/days)	Solved today no problems foreseen in the future	1	5 Float gauges	Tide gauge benchmark levelled to the national geodetic datum (2015)	0		Delayed Mode QC	PSMSL, HHI website (https://adriaticsea.hhi.hr//)	Srđan Čupić srdjan.cupic@hhi.hr
Ruđer Bošković Institute, Croatia	1	1	Storm surge/ tsunami warning	Own personnel and resources	Open and free only for research	55-min	Near-real time (minutes/hours/days)	Solved today no problems foreseen in the future	1	Radar gauge			Waves, surface currents, ocean temperature	None	https://hv.geolux-radars.com/sites/sibenik-svante.html
Italian Institute for Environmental Protection and Research (ISPRA)	62	62	All: multi-purpose	Subcontrating maintenance	Open and free	1-min/5-min	Near-real time (minutes/hours/days)	Solved today no problems foreseen in the future	1 or 2	Radar gauge	Tide gauge benchmark levelled to the national geodetic datum (2010) or Tide gauge benchmark levelled to the local datum (Venezia Punta della Salute ZMPS)	6	Atmospheric parameters (wind, pressure, air temperature, humidity), sea surface temperature	Automatic NRT QC and Delayed Mode QC and products	ISPRA websites (http://dati.isprambiente.it, www.mareografico.it, www.venezia.isprambiente.it), IOC, EMODnet Physics	Maurizio Ferla retemareografica@isprambiente.it venezia@isprambiente.it
Balearic Islands Coastal Observing and Forecasting System	6	6	All: multi-purpose	Own personnel and resources	Open and free	1-min	Near-real time (minutes/hours/days)	Solved today no problems foreseen in the future	1	Pressure sensor	TG benchmark levelled to geodetic datum	0	Air pressure (6), sea water temperature (5)	Automatic NRT QC and Delayed Mode QC and products	SOCIB website and CMEMS	Joaquín Tintoré (jtintore@socib.es)
Slovenian Environment Agency	1	1	All: multi-purpose	Own personnel and resources	Open and free	10-min	Near-real time (minutes/hours/days)	Solved today no problems foreseen in the future	2	1 float gauge, 1 radar gauge	Tide gauge benchmark levelled to the national geodetic datum (2010)	1	sea temperature, air pressure, air Temperature, relative humidity, solar irradiance	Automatic NRT QC and Delayed Mode QC and products	http://www.arso.gov.si/vode/podatki/amp/H9350_g_1.html	maja.jeromel@gov.si
General Directorate of Mapping, Turkey	20	20	All: multi-purpose	Own personnel and resources	Open and free through specific data portal	30 sec for NEAMTWS 15-min for general purpose	30 sec data real time 15 min data near-real time (minutes/hours/days)	Solved today no problems foreseen in the future	1	Radar gauge	All of the stations levelled (high precision) to the national geodetic datum. Periodic levelling on the vicinity of the tide gauge during routine maintenance visits	8 @ MedSea 4 @ Marmara Sea 5 @ BlackSea	Atmospheric pressure	Delayed Mode QC	https://tudes.harita.gov.tr/?lang=us	Mehmet Simav mehmet.simav@harita.gov.tr
National Institute for Marine Research and Development "Grigore Antipa", Romania	3	3	Tides and hydrography	Own personnel and resources	Open and free through specific data portal	30-min/1 h	Delayed mode	Solved today but problems expected in the near future	1	Pressure sensor	All of the stations levelled (high precision) to the national geodetic datum. Periodic levelling on the vicinity of the tide gauge during routine maintenance visits once per year.	0		Delayed Mode QC	http://www.nodc.ro/	dniculescu@alpha.rmri.ro
National Institute of Oceanography, Israel Oceanographic and Limnological Research, Israel	4	2	Mixed: site dependent	Own personnel and resources	Other	5 min (pressure sensors), seconcs (radar sensors)	Near-real time (minutes/hours/days)	Solved today no problems foreseen in the future	1	Pressure sensor	leveled to national geodetic datum periodically. (currently checking level)		wave height and period, current, temperature, salinity, fluorescence, turbidity, oxygen	Automatic NRT QC and Delayed Mode QC and products	https://isramar.ocean.org.il/isramar_data/TimeSeries.aspx https://isramar.ocean.org.il/isramar2009/Hadera/	Ayah Lazar ayahlazar@ocean.org.il Yotam Fadida yotam@ocean.org.il
Hrvatske vode (Croatian Waters), Croatia	3	3	Storm surge/ tsunami warning	Subcontrating maintenance	Open and free through specific data portal	hour	Near-real time (minutes/hours/days)	Solved today no problems foreseen in the future	1	Float gauge	leveled to national geodetic datum.			Delayed Mode QC		Darko.Barbalic@voda.hr
National Institute of Oceanography and Fisheries (NIOF), Egypt	7	7	Tides and hydrography	Subcontrating maintenance	Open and free	30-min	Delayed mode	No maintenance today	1	Float gauge	leveled to national geodetic datum			Delayed Mode QC		Mohamed Said mamsaid2@hotmail.com
Institute of Oceanology, Bulgarian Academy of Sciences (IO-BAS)	5	5	All: multi-purpose	Own personnel and resources	Open and free through specific data portal	2-min	Real time (<= 1min)	Solved today no problems foreseen in the future	1	Radar gauge	leveled to national geodetic datum			None	http://bgodc.io-bas.bg/sea-level/ http://bgodc.io-bas.bg/ma/DefaultENG.aspx	Atanas Palazov palazov@io-bas.bg
National Intitut of Cartography an Remote Sensing / Hyrographic Service of Naval Forces (Algeria)	6	6	Tides and geodesy and long-term msl	Own personnel and resources	There are some restrictions	5 Hz resampled to 1-min	Delayed mode	Solved today no problems foreseen in the future	1	Acoustic tide gauge sensor pressure, Atmospheric, wind speed and temperature sensors	All the tide gauges are linked to a reference GNSS station and also linked to the High Precision Leveling Network of Algeria (NGA).	1 actually (5 Being deployed)	pressure, Atmospheric, wind speed, temperature humidity and gravimetric measurements	Delayed Mode QC and products	on demand	contact@inct.dz
Institute of Hydrometeorology and Seismology (Montenegro)	2	2	Tides and hydrography	Own personnel and resources	Open and free only for research	6 min	Near-real time (minutes/hours/days)	Solved today no problems foreseen in the future	1	Float gauge	One station levelled (high precision) to the national geodetic datum, 1 are planned to be levelled	0	N/A	Delayed Mode QC	On demand	office@meteo.co.me
European Commission Joint Research Centre	35	24	All: multi-purpose	Own personnel and resources	Open and free	6.7 Hz resampled to 5 s	Real time (<= 1min)	Solved today but problems expected in the near future	1	Acoustic gauge	Averaged to the mean value of the installation country		Air Temperature	Other (locally evaluated to raise alerts for anomalous behaviour)	https://webcritech.jrc.ec.europa.eu/TAD_server/Home	alessandro.annunziato@ec.europa.eu
Institute of Geoscience (Albania)	4	4	Tides and hydrography and long-term msl	Own personnel and resources	Open and free only for research		Delayed mode	No maintenance nor plans for funding in the near future	1	Float gauge	Averaged to the mean value of the installation country				www.geo.edu.al	klodianzaimi@yahoo.com
Meteolestartit/CSIC (Spain)	1	1	Geodesy and long-term msl	Own personnel and resources		analogic (sampled every 2h)	Delayed mode	Solved today no problems foreseen in the future	1	Float gauge	georeferenced every 5 years and data is backwards linearly corrected in each period		meteorological basic parameters: temperature, humidity, pressure, wind, rain, potential evaporation and weekly sea temperature and salinity in the upper 80 m, nearby.			<jpascual@meteolestartit.cat>
All-Russian Research Institute of Hydrometeorological Information - World Data Center (RIHMI-WDC), Russia	23	23	Tides storm surge long term msl and geodesy	Own personnel and resources	Other	1 hour	Delayed mode	Solved today no problems foreseen in the future	1	Float gauge	Tide-gauge benchmark levelled to the national geodetic datum	1	Sea Temperature, Salinity, Wind waves	Delayed Mode QC and products	http://portal.esimo.ru	nodc@meteo.ru
National Observatory of Athens	19	19	Storm surge/ tsunami warning		Open and free through specific data portal	20 s	Real time (<= 1min)			Radar gauge

## Sheet: Hoja 2
r
